# Supplementary material
Source: Springer Nature journal article supplement (https://www.springermedizin.de/resource/supplementary/12916_2007_142_MOESM2_ESM.pdf/9599292)

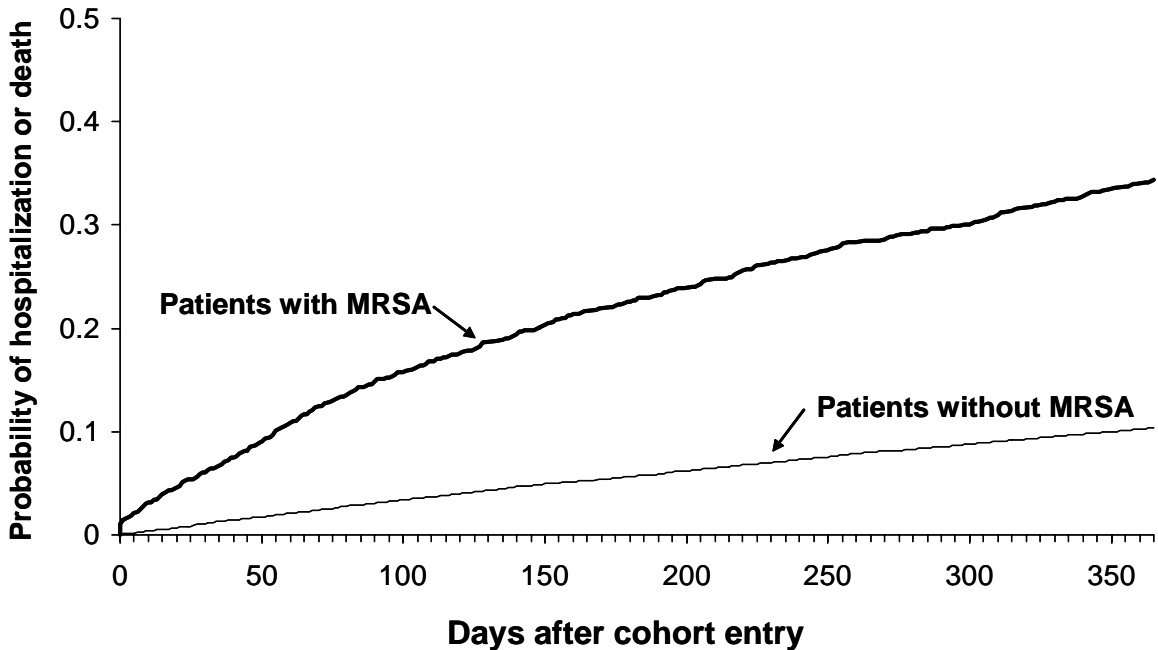

Supplement: MOESM2 [file 9599292]
